# Supplementary material
Source: publisher site journal article supplement (https://www.spandidos-publications.com/3511/downloadSupplementary)
Supplement: Supplementary file 1 [file downloadSupplementary]

Figure S1. Synergistic inhibition of low-dose cytarabine and pan-RAF inhibitors in the proliferation of *RAS* mutant cells. Cell proliferation was assessed in HL-60 (*NRAS* Q61L), NB4 (*KRAS* A18D) and KG-1 cells (wild-type *RAS*) after treatment with low dose-cytarabine and the pan-RAF inhibitors (A) LY3009120 or (B) LXH254. Grey and white represent high and low percent proliferation, respectively.

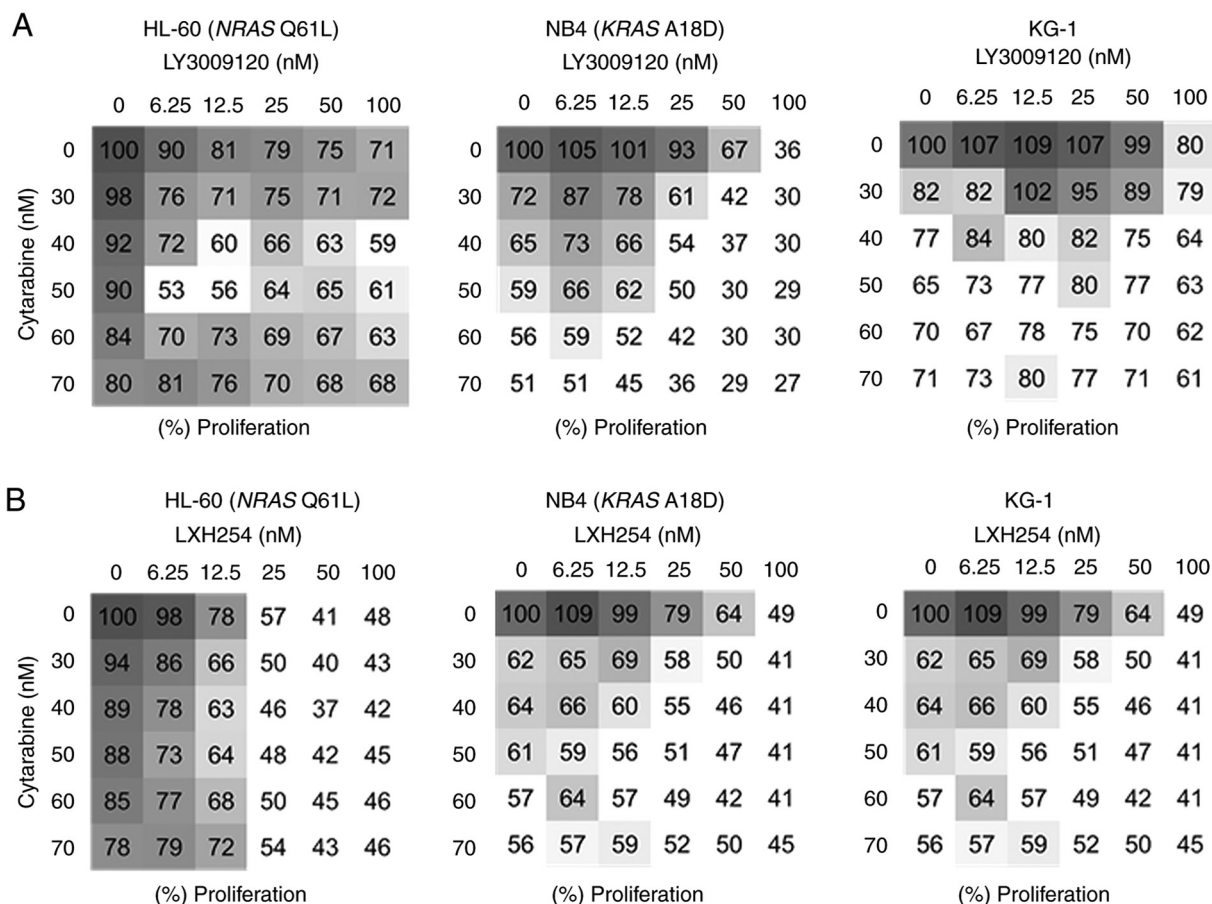

Figure S2. Evaluation of the synergistic effect of azacitidine combined with pan-RAF inhibitors. Cell proliferation was assessed in HL-60 (*NRAS* Q61L), NB4 (*KRAS* A18D) and KG-1 (wild-type *RAS*) cells after treatment with azacitidine and the pan-RAF inhibitors (A) LY3009120 or (B) LXH254. Black and grey represent high and low percent proliferation, respectively.

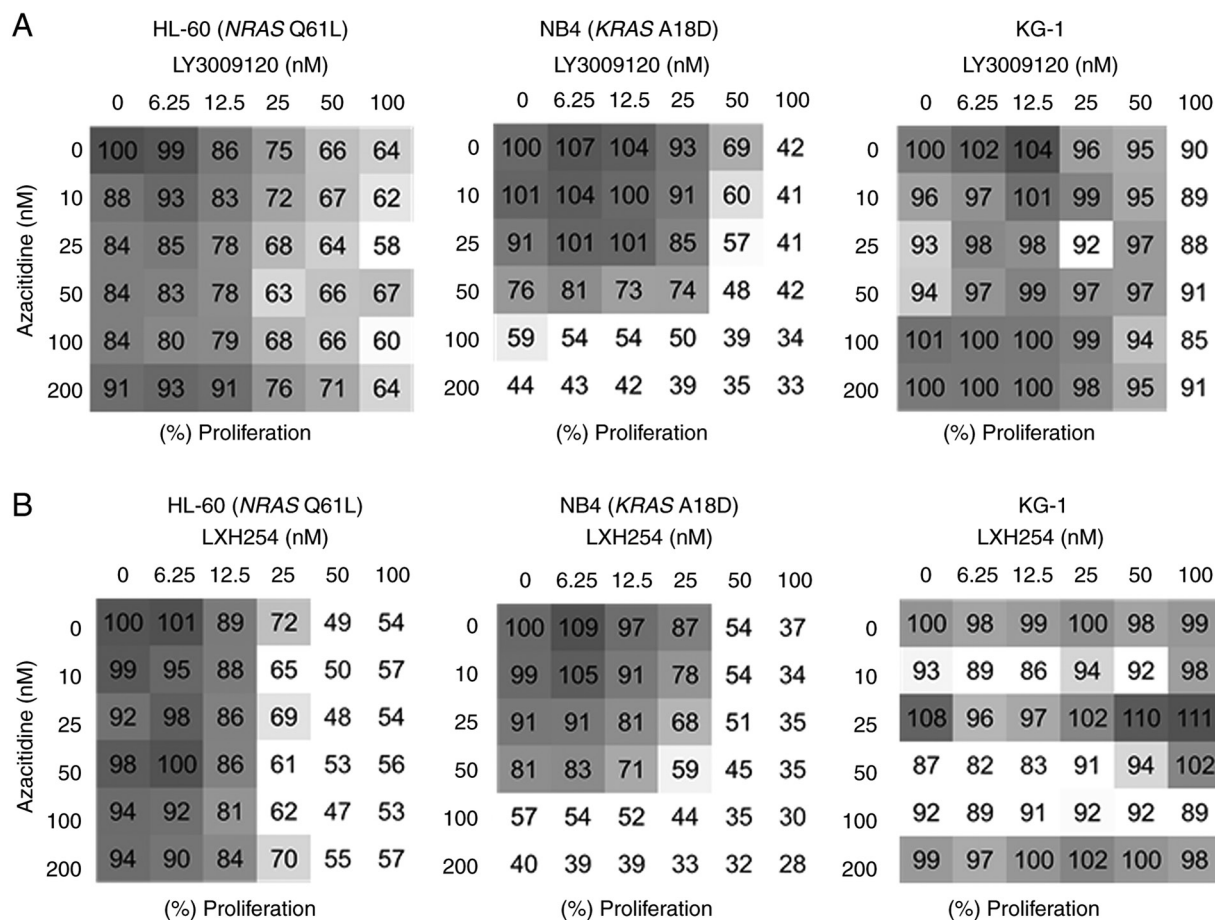

Figure S3. No induction of autophagy in *RAS* mutant acute myeloid leukemia cells following treatment with low-dose cytarabine combined with LY3009120. The HL-60 cell line was treated with 50 nM cytarabine, 6 nM LY3009120 or 50 nM cytarabine + 6 nM LY3009120. The NB4 cell line was treated with 50 nM cytarabine, 50 nM LY3009120 or 50 nM cytarabine + 50 nM LY3009120. Western blotting was performed using antibodies against LC-3, Beclin1 and p62.

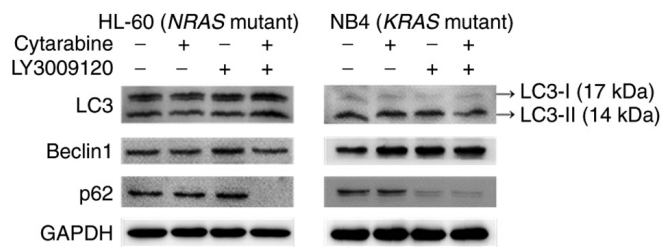

Figure S4. Data on the induction of apoptosis in primary cells of *NRAS* mutant AML following treatment with low-dose cytarabine combined with LY3009120. Cells were treated with inhibitors at the indicated concentrations for 72 h to ensure apoptosis. The apoptotic cells were analyzed by Annexin V and PI staining. AML, acute myeloid leukemia; BM, bone marrow.

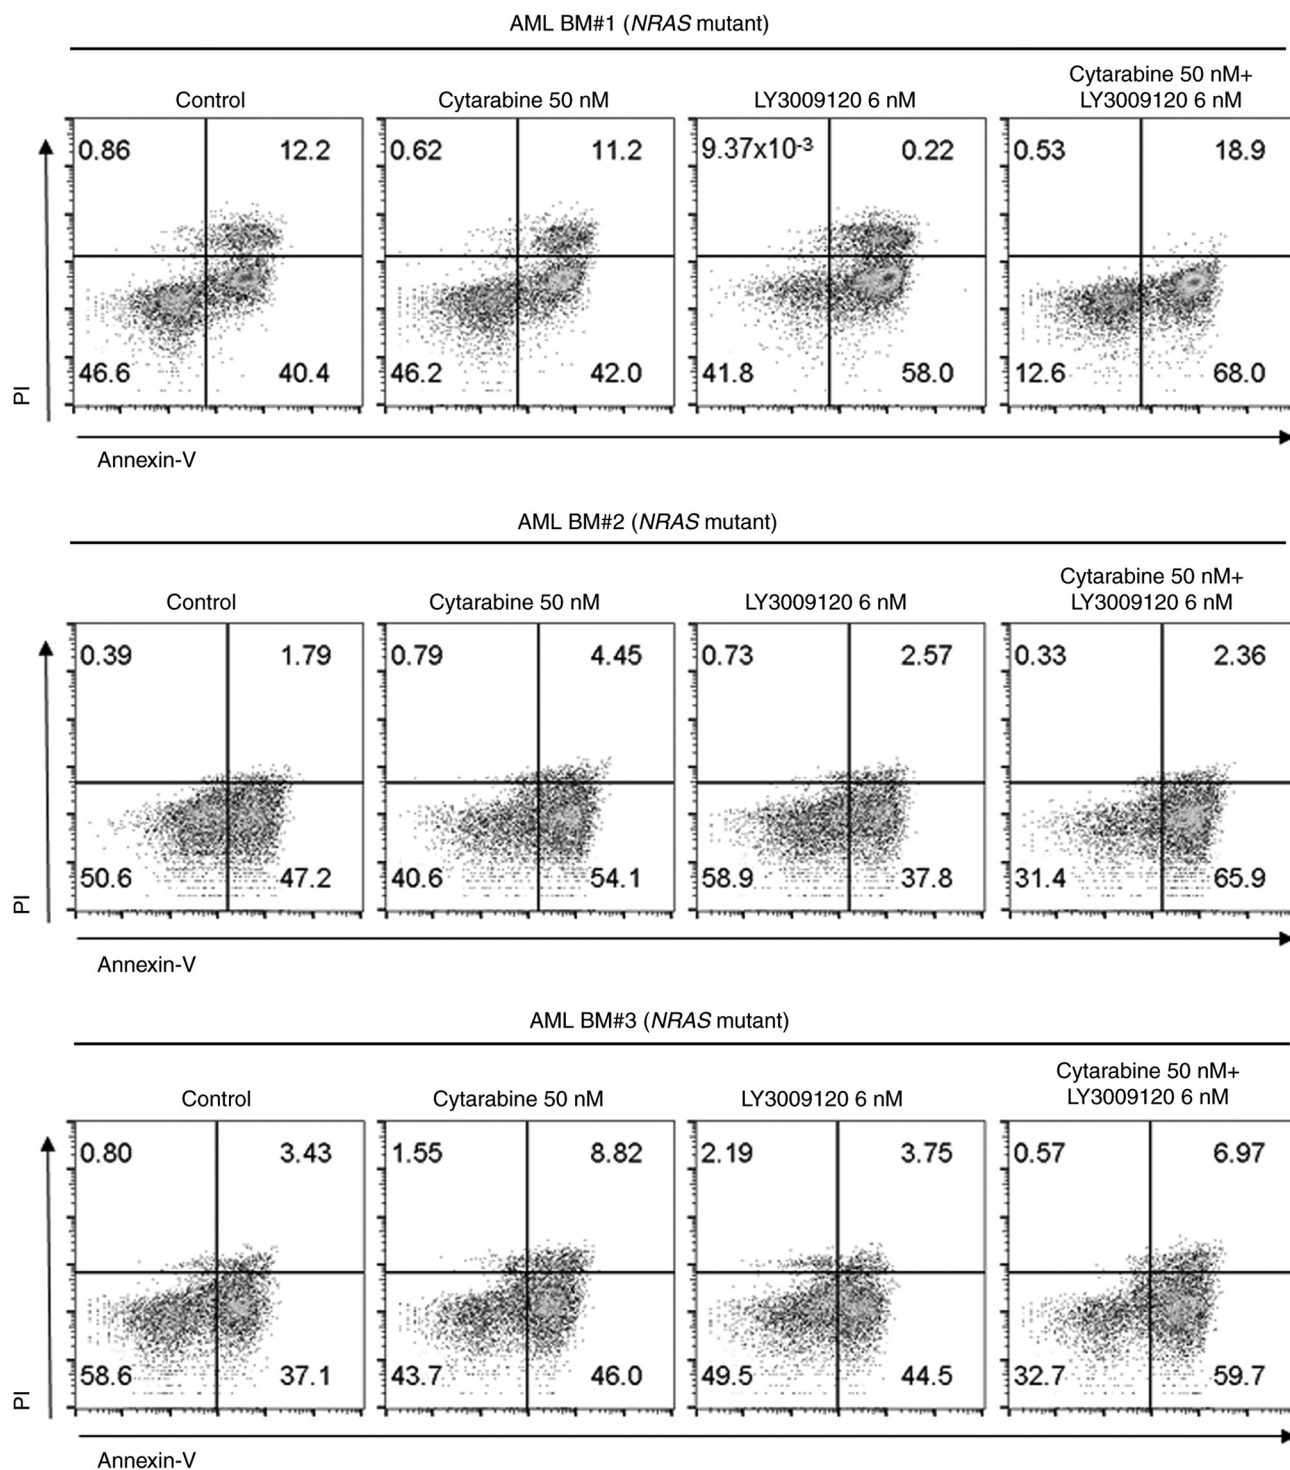

Figure S5. Data on the induction of apoptosis in primary cells of *KRAS* mutant AML following treatment with low-dose cytarabine combined with LY3009120. Cells were treated with inhibitors at the indicated concentrations for 72 h to ensure apoptosis. The apoptotic cells were analyzed by Annexin V and PI staining. AML, acute myeloid leukemia; BM, bone marrow.

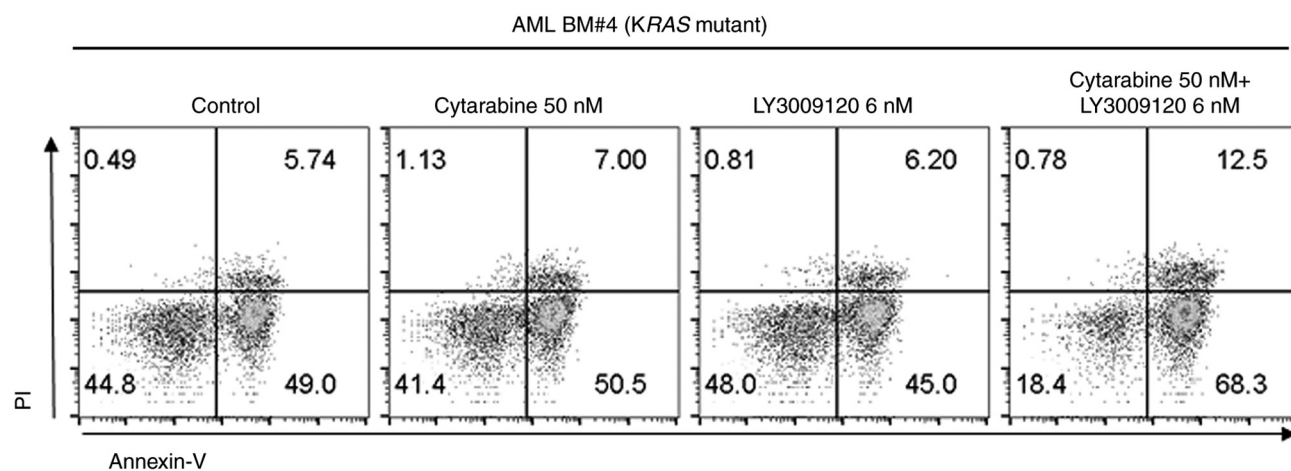

Table SI. Measurement of IC<sub>50</sub> values following treatment with cytarabine and MAPK inhibitors in AML cells with wild type (KG-1) or mutated RAS (HL-60 and NB4).

| Cell line | IC <sub>50</sub> , $\mu$ M |             |           |        |            |            |
|-----------|----------------------------|-------------|-----------|--------|------------|------------|
|           | Cytarabine                 | Azacitidine | LY3009120 | LXH254 | Dabrafenib | Trametinib |
| HL-60     | 1.73                       | 0.55        | 0.26      | 0.96   | 3.36       | N/A        |
| NB4       | 0.26                       | 4.19        | 0.09      | 0.17   | 1.80       | 0.00       |
| KG-1      | 1.44                       | 9.99        | 0.44      | 4.89   | 21.28      | 0.00       |

AML cell lines were cultured under standard conditions in the presence of DMSO or each drug. After 72 h, using WST-8 solution, the IC<sub>50</sub> was calculated as the concentration of drug required to inhibit 50% proliferation compared with control cells cultured in the absence of drug. AML, acute myeloid leukemia; N/A, measurement not possible due to the value being too low.

Table SII. Clinical information of patients with primary AML.

| Sample ID | Sex | Age, years | BM blast, % | Cellularity, % | WBC count, $1 \times 10^3/\mu\text{l}$ | Hb, g/dl | Platelet count, $1 \times 10^3/\mu\text{l}$ | RAS mutation |
|-----------|-----|------------|-------------|----------------|----------------------------------------|----------|---------------------------------------------|--------------|
| AML BM #1 | F   | 50         | 9.8         | 51-60          | 1.81                                   | 10.1     | 229                                         | <i>NRAS</i>  |
| AML BM #2 | F   | 78         | 50.5        | 41-50          | 74.26                                  | 8.1      | 46                                          | <i>NRAS</i>  |
| AML BM #3 | F   | 69         | 84.0        | 70-80          | 11.41                                  | 9.9      | 23                                          | <i>NRAS</i>  |
| AML BM #4 | M   | 22         | 92.6        | >95            | 2.01                                   | 11.3     | 152                                         | <i>KRAS</i>  |

BM mononuclear cells from patients with AML isolated by the Ficoll gradient method were used. AML, acute myeloid leukemia; F, female patient; M, male patient; BM, bone marrow; WBC, white blood count; Hb, hemoglobin.
